# Supplementary material
Source: publisher figshare collection journal article supplement (https://acs.figshare.com/ndownloader/files/18022148)
Supplement: Supplementary file 1 [file 18022148]

Compound_ID,SMILES,"Ki (CAII)[nM] in vitro inhibition
",Ki (CAIX) [nM] in vitro inhibition,IC50 [µM] cytotoxicity against cell line  MRC-5,IC50 [µM] cytotoxicity against cell lineBJ,IC50 [µM] cytotoxicity against cell line CCRF-CEM,IC50 [µM] cytotoxicity against cell line CEM-DNR,IC50 [µM] cytotoxicity against cell line K652,IC50 [µM] cytotoxicity against cell line K562-TAX,IC50 [µM] cytotoxicity against cell line A549,IC50 [µM] cytotoxicity against cell line HCT116,IC50 [µM] cytotoxicity against cell line HT-29,IC50 [µM] cytotoxicity against cell line HeLa,IC50 [µM] cytotoxicity against cell line 4T1-luc,IC50 [µM] cytotoxicity against cell line MDCK-CAIX,IC50 [µM] cytotoxicity against cell line MDCK-NEO,HCT116 MCS size 3 days of treatment under normoxic conditions IC50 values (µM) ,HCT116 MCS size 7 days of treatment under normoxic conditions IC50 values (µM) ,HT-29 MCS size 3 days of treatment under normoxic conditions IC50 values (µM) ,"HT-29 MCS size 7 days of treatment under normoxic conditions IC50 values (µM) 
7 days"
1-,[H]B1234B567([H])B89%10([H])B%11%12(B%13%1047[H])([H])B1%14%13([H])B%11%15%16([H])C%142(C36%17%18[H])([H])[Co]%15%19%20%21%22%23%18(C%24%25%26([H])C%20%27%28([H])B%21%29%30([H])B%22%31%32(OCCOCCNS(=O)(N)=O)B%24%23%33([H])B%31%34%35([H])B%29%32%36([H])B%30%27%37([H])B%36%34%38([H])B%33%25%35([H])B%37%28%26%38[H])B85%17([H])B%16%129%19[H],156 ± 22,2.70 ± 0.46,>100,>100,95 ± 5,>100,>100,>100,>100,>100,>100,>100,>100,>100,>100,N/D,N/D,N/D,N/D
2-,[H]B1234B567([H])B89%10([H])B%11%12(B%13%1047[H])([H])B1%14%13([H])B%11%15%16([H])C%142(C36%17%18[H])([H])[Co]%15%19%20%21%22%23%18(C%24%25%26([H])C%20%27%28([H])B%21%29%30([H])B%22%31%32(OCCCCCNS(=O)(N)=O)B%24%23%33([H])B%31%34%35([H])B%29%32%36([H])B%30%27%37([H])B%36%34%38([H])B%33%25%35([H])B%37%28%26%38[H])B85%17([H])B%16%129%19[H],72 ± 10,0.98 ± 0.20,>100,>100,90 ± 6,95 ± 8,99 ± 2,96 ± 4,>100,85 ± 3,>100,>100,70 ± 6,94 ± 11,88 ± 18,N/D,N/D,N/D,N/D
3-,[H]B1234B567([H])B89%10([H])B%11%12(B%13%1047[H])([H])B1%14%13([H])B%11%15%16([H])C%142(C36%17%18[H])([H])[Co]%15%19%20%21%22%23%18(C%24%25%26([H])C%20%27%28([H])B%21%29%30([H])B%22%31%32(CNS(=O)(N)=O)B%24%23%33([H])B%31%34%35([H])B%29%32%36([H])B%30%27%37([H])B%36%34%38([H])B%33%25%35([H])B%37%28%26%38[H])B85%17([H])B%16%129%19OC,466 ± 59,6.32 ± 1.20,78 ± 1,76 ± 3,62 ± 18,75 ± 8,74 ± 4,55 ± 5,95 ± 4,69 ± 3,>100,89 ± 17,99 ± 3,>100,>100,N/D,N/D,N/D,N/D
4,[H]B1234B567([H])B89%10([H])B%11%12(B%13%1047[H])([H])B1%14%13([H])B%11%15%16([H])C%142(C36%17%18[H])([H])[Co]%15%19%20%21%22%23%18(C%24%25%26([H])C%20%27%28([H])B%21%29%30([H])B%22%31%32(C[NH2]CCNS(=O)(N)=O)B%24%23%33([H])B%31%34%35([H])B%29%32%36([H])B%30%27%37([H])B%36%34%38([H])B%33%25%35([H])B%37%28%26%38[H])B85%17([H])B%16%129%19OC,510 ± 85,2.29 ± 0.29,27 ± 5,65 ± 4,17 ± 1,48 ± 8,18 ± 1,17 ± 1,34 ± 8,17 ± 0,12 ± 1,12 ± 1,13 ± 1,13 ± 0,13 ± 0,N/D,N/D,N/D,N/D
5-,[H]B1234B567([H])B89%10([H])B%11%12(B%13%1047[H])([H])B1%14%13([H])B%11%15%16([H])C%142(C36%17%18[H])([H])[Co]%15%19%20%21%22%23%18(C%24%25%26([H])C%20%27%28(CNS(=O)(N)=O)B%21%29%30([H])B%22%31%32([H])B%24%23%33([H])B%31%34%35([H])B%29%32%36([H])B%30%27%37([H])B%36%34%38([H])B%33%25%35([H])B%37%28%26%38[H])B85%17([H])B%16%129%19[H],5.9 ± 1.2,0.12 ± 0.02,93 ± 7,>100,85 ± 23,100 ± 0,99 ± 2,66 ± 8,>100,75 ± 4,>100,90 ± 15,>100,>100,>100,N/D,N/D,N/D,N/D
6-,[H]B1234B567([H])B89%10([H])B%11%12(B%13%1047[H])([H])B1%14%13([H])B%11%15%16([H])C%142(C36%17%18[H])([H])[Co]%15%19%20%21%22%23%18(C%24%25%26([H])C%20%27%28(CCNS(=O)(N)=O)B%21%29%30([H])B%22%31%32([H])B%24%23%33([H])B%31%34%35([H])B%29%32%36([H])B%30%27%37([H])B%36%34%38([H])B%33%25%35([H])B%37%28%26%38[H])B85%17([H])B%16%129%19[H],26 ± 11,0.063 ± 0.03,98 ± 4,>100,67 ± 3,86 ± 4,>100,74 ± 2,85 ± 3,50 ± 1, 78 ± 9,>100,>100,>100,>100,109 ± 1,78 ± 2,>500,141 ± 39
7-,[H]B1234B567([H])B89%10([H])B%11%12(B%13%1047[H])([H])B1%14%13([H])B%11%15%16([H])C%142(C36%17%18[H])([H])[Co]%15%19%20%21%22%23%18(C%24%25%26([H])C%20%27%28(CCCNS(=O)(N)=O)B%21%29%30([H])B%22%31%32([H])B%24%23%33([H])B%31%34%35([H])B%29%32%36([H])B%30%27%37([H])B%36%34%38([H])B%33%25%35([H])B%37%28%26%38[H])B85%17([H])B%16%129%19[H],336 ± 100,0.65 ± 0.09,>100,>100,71 ± 6,44 ± 7,98 ± 2,67 ± 3,>100,52 ± 3,>100,>100,>100,>100,>100,N/D,N/D,N/D,N/D
8-,[H]B1234B567([H])B89%10([H])B%11%12(B%13%1047[H])([H])B1%14%13([H])B%11%15%16([H])C%142(C36%17%18[H])(CCNS(=O)(N)=O)[Co]%15%19%20%21%22%23%18(C%24%25%26(CCNS(=O)(N)=O)C%20%27%28([H])B%21%29%30([H])B%22%31%32([H])B%24%23%33([H])B%31%34%35([H])B%29%32%36([H])B%30%27%37([H])B%36%34%38([H])B%33%25%35([H])B%37%28%26%38[H])B85%17([H])B%16%129%19[H],35.4 ± 3.4,0.56 ± 0.07,96 ± 7,>100,69 ± 7,82 ± 16,80 ± 10,100 ± 1,>100,79 ± 1,>100,97 ± 7,>100,>100,>100,125 ± 2,84 ± 16,>500,59 ± 12
9-,[H]B1234B567([H])B89%10([H])B%11%12(B%13%1047[H])([H])B1%14%13([H])B%11%15%16([H])C%142(C36%17%18[H])(CCCNS(=O)(N)=O)[Co]%15%19%20%21%22%23%18(C%24%25%26([H])C%20%27%28(CCCNS(=O)(N)=O)B%21%29%30([H])B%22%31%32([H])B%24%23%33([H])B%31%34%35([H])B%29%32%36([H])B%30%27%37([H])B%36%34%38([H])B%33%25%35([H])B%37%28%26%38[H])B85%17([H])B%16%129%19[H],31.2 ± 4.3,0.74 ± 0.08, >100,>100, 69 ± 10, 76 ± 5, 75 ± 4,99 ± 3, >100, 88 ±14, >100, >100, >100, >100, >100,N/D,N/D,N/D,N/D
